# Supplementary material
Source: PubMed Central journal article supplement (PMC3258500)
Supplement: NIHMS339794-supplement-01.pdf [file NIHMS339794-supplement-01.pdf]

**Neuron, Volume 72**

**Supplemental Information**

**Recruitment of Endophilin to Clathrin-Coated**

**Pit Necks Is Required for Efficient**

**Vesicle Uncoating after Fission**

**Ira Milosevic, Silvia Giovedi, Xuelin Lou, Andrea Raimondi, Chiara Collesi,  
Hongying Shen, Summer Paradise, Eileen O'Toole, Shawn Ferguson, Ottavio  
Cremona, and Pietro De Camilli**

# A Endophilin 1 KO targeting strategy

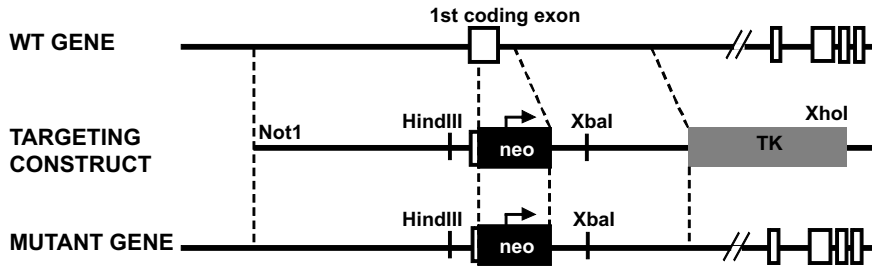

# Endophilin 2 KO targeting strategy

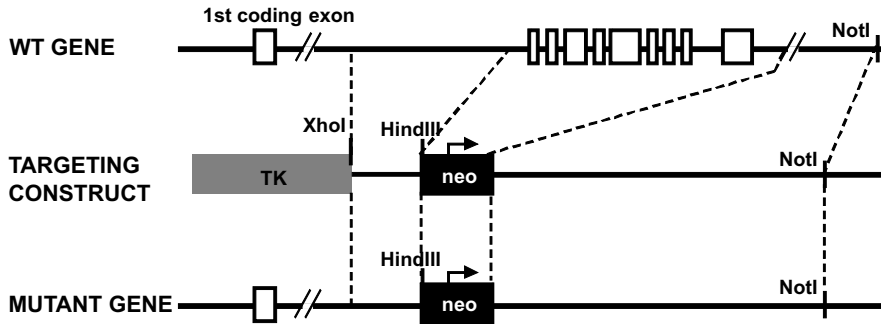

1<sup>st</sup> coding exon encodes for 15 aa: MSVAGLKKQEYKASQ

# Endophilin 3 conditional KO targeting strategy

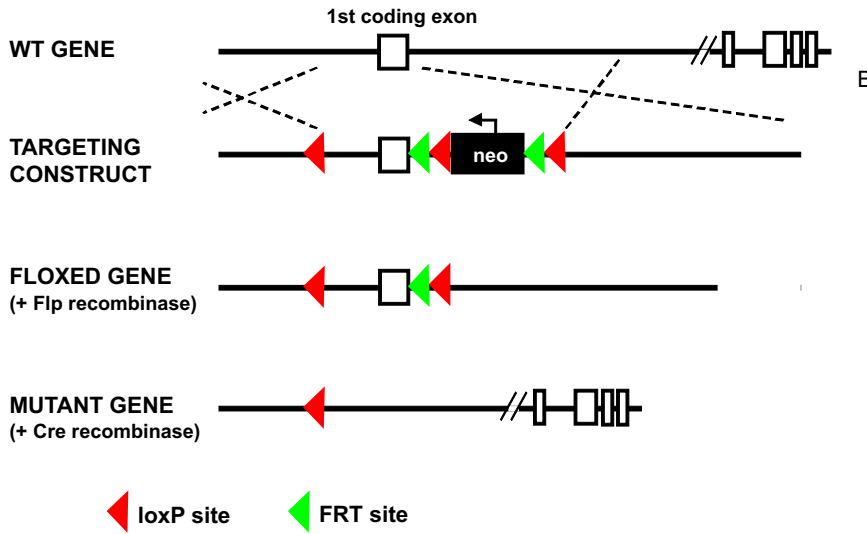

**B** E1<sup>-/-</sup>E2<sup>+/+</sup>E3<sup>-/-</sup>

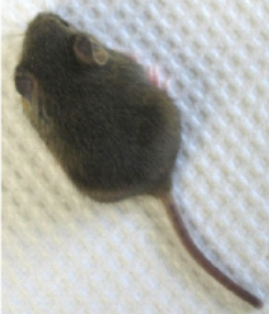

E1<sup>+/+</sup>E2<sup>-/-</sup>E3<sup>-/-</sup>

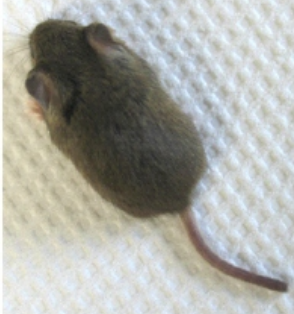

**C** E1<sup>-/-</sup>E2<sup>+/-</sup>E3<sup>-/-</sup>

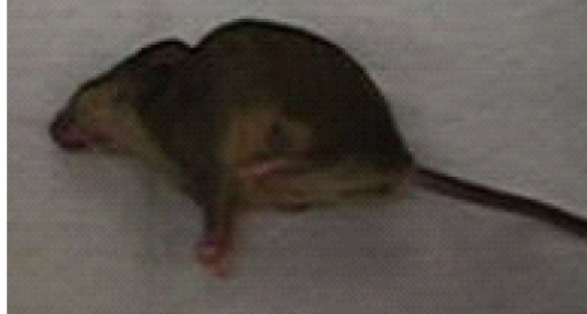

**Figure S1. Endophilin 1, 2 and 3 single knock-out (KO) mice: gene deletion strategies.**

(A) Schematic representation of endophilin 1 and 2 gene KO targeting strategies and of the endophilin 3 conditional KO gene targeting strategy. Mating of heterozygous mice produced pups with a typical Mendelian distribution for all three single KOs. Single KO mice did not have an obvious phenotype.

(B) Two months old mice double KO for endophilin 1 and 2, or endophilin 1 and 3, respectively. These mice were phenotypically normal.

(C) Mice double KO mice for endophilin 1 and 3 and heterozygous for endophilin 2 (three months old) were viable, but showed spontaneous epileptic, sometimes lethal, seizures. A 3 month old mouse is shown during a seizure.

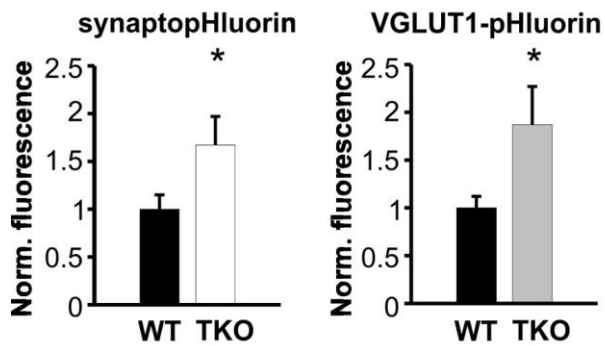

**Figure S2. Increased accumulation of pHluorin-conjugated synaptic vesicle proteins in the plasma membrane of endophilin TKO neurons.**

The fraction of synaptopHluorin and VGLUT1-pHluorin stranded at the plasma membrane was calculated by expressing the fluorescence of random neuronal processes in live cultures in Tyrode buffer as a fraction of the total fluorescence of the same processes after exposure to ammonium chloride (to collapse the low pH of the lumen of synaptic vesicles and of other endocytic compartments). Values were normalized to the surface fluorescence of WT cells. At least 25 images from 4 animals per condition were analyzed. \* $p < 0.05$  compared to WT, error bars represent SEM.

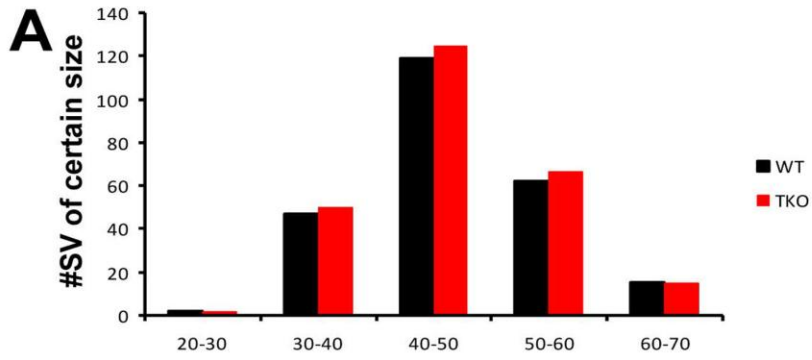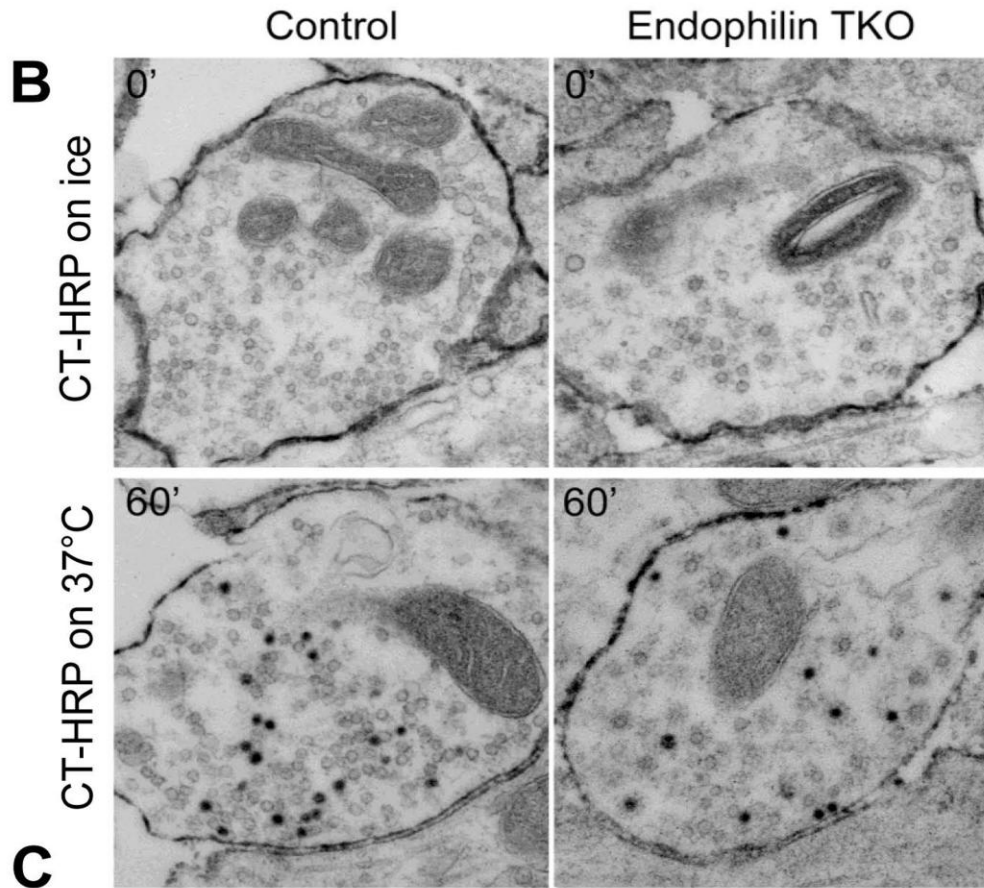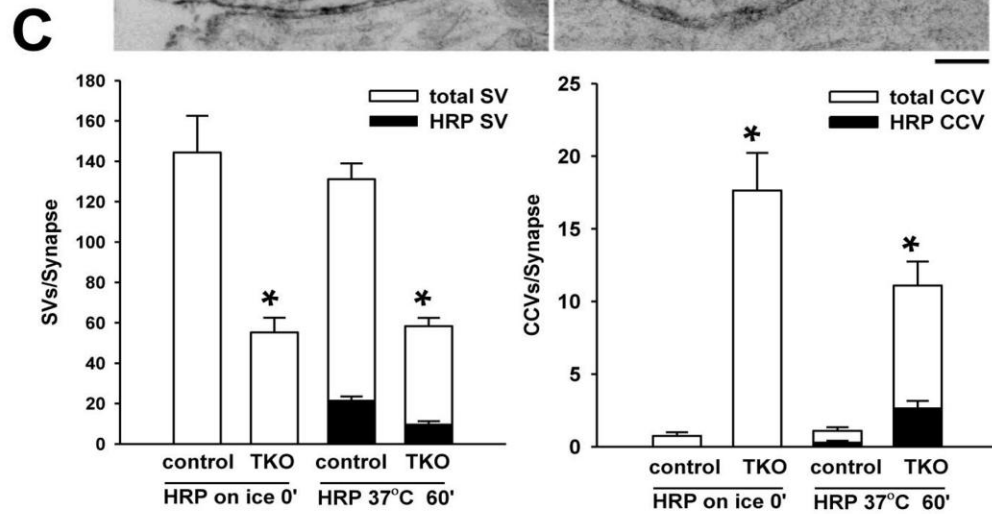

**Figure S3. Ultrastructural analysis of endophilin TKO synapses.**

(A) Size of synaptic vesicles at WT and endophilin TKO synapses in neuronal cultures (DIV 18-24). More than 250 vesicles from 2 independent experiments were analyzed for each condition.

(B) and (C) Neuronal cultures from WT and TKO mice were briefly incubated on ice with horseradish peroxidase-conjugated cholera-toxin (CT-HRP) and then either fixed or further incubated in Tyrode's buffer at 37°C for 1 hr before fixation. (B) Representative EM micrographs of the samples. Note that in the control sample the vesicles are SVs, while in the TKO sample they are primarily CCVs. (C) Quantification of the changes in total SV and CCV numbers, and of the HRP labeled and unlabeled fractions of the vesicles (\* $p < 0.001$ , t-test). Error bars represent S.E.M.

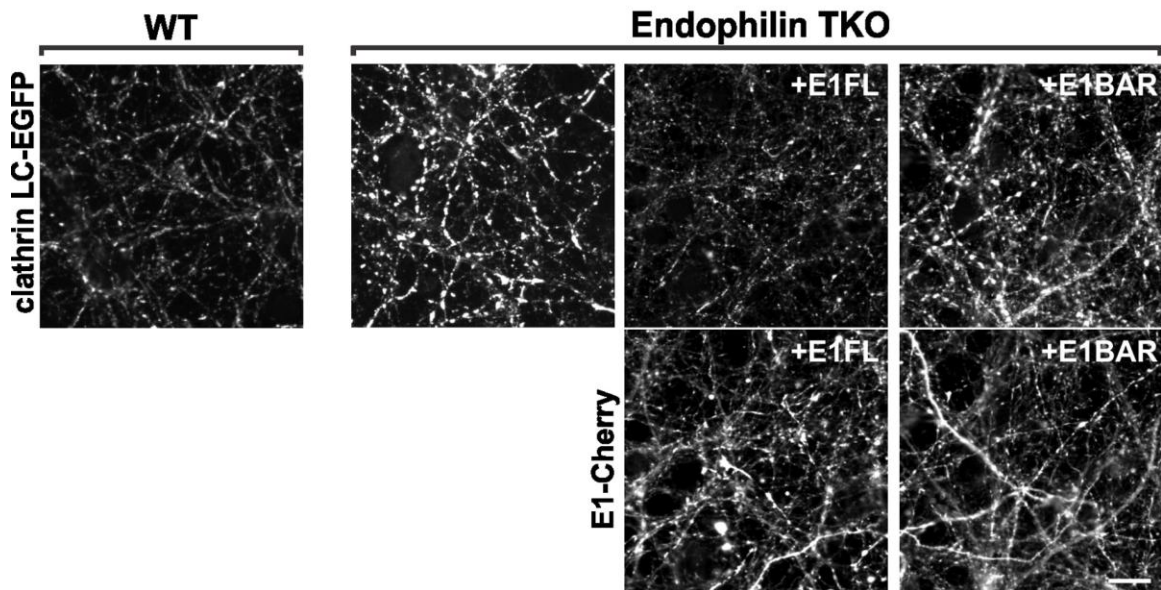

**Figure S4. Expression of full-length endophilin 1, but not of its BAR domain, rescues the clustered localization of clathrin in endophilin TKO cultures.**

Fluorescence images of EGFP-clathrin LCa in cortical cultures (DIV 18-25) of WT mice, endophilin TKO mice, endophilin TKO mice expressing Cherry conjugated full length endophilin 1 (E1FL) and endophilin TKO mice expressing the Cherry conjugated endophilin 1 BAR construct (E1BAR). Note that the presence of large clusters of clathrin in endophilin TKO cultures could be rescued by expression of endophilin 1 full length, but not of its BAR domain. These types of images were used for the quantification of the clustered fluorescence in the four conditions as reported in Fig 6D. At least 10 images per condition from 6 independent experiments were analyzed.

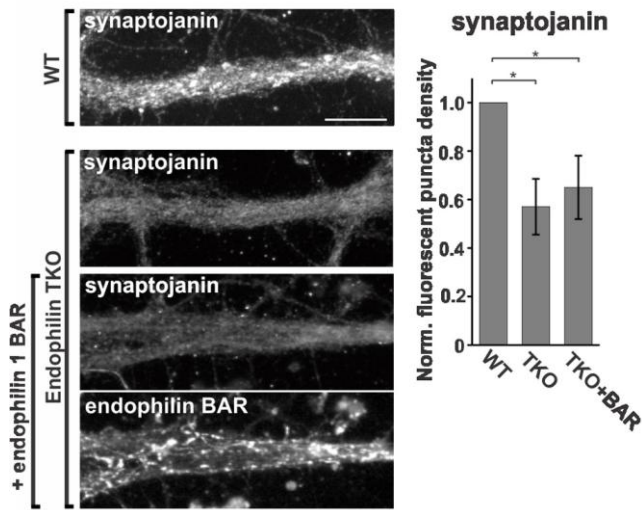

**Figure S5. The altered localization of synaptojanin 1 in endophilin TKO neurons could not be rescued by overexpression of C-terminally Cherry-tagged endophilin BAR construct.**

Representative images are shown at left. Quantification of the results (normalized to WT) are shown at right. At least 10 images per condition from 3 animals were analyzed, neuronal cultures were 17-22 days old. \* $p < 0.05$ , t-test, error bars represent S.E.M.



**Table S1. LIST OF ANTIBODIES**

|                            |                                                             |
|----------------------------|-------------------------------------------------------------|
| endophilin 1               | De Camilli Lab, Yale Univeristy, New Haven, CT              |
| endophilin 2               | De Camilli Lab, Yale Univeristy, New Haven, CT              |
| endophilin 3               | Santa Cruz, CA                                              |
| pan-endophilin             | De Camilli Lab, Yale Univeristy, New Haven, CT              |
| actin                      | ICN Biomedicals, Aurora, OH                                 |
| clathrin heavy chain (CHC) | Affinity Bioreagents, Rockford, IL                          |
| clathrin light chain (CLC) | Gift from R. Jahn, Max Planck Institute, Gottingen, Germany |
| $\alpha$ -adaptin          | Affinity Bioreagents, Rockford, IL                          |
| AP-180                     | De Camilli Lab, Yale Univeristy, New Haven, CT              |
| Dynamin I and pan          | De Camilli Lab, Yale Univeristy, New Haven, CT              |
| amphiphysin I              | De Camilli Lab, Yale Univeristy, New Haven, CT              |
| synapsin                   | De Camilli Lab, Yale Univeristy, New Haven, CT              |
| synaptophysin              | Chemicon, Temecula, CA                                      |
| synaptotagmin 1            | Gift from R. Jahn, Max Planck Institute, Gottingen, Germany |
| synaptobrevin 2            | Synaptic Systems, Goettingen, Germany                       |
| Bassoon                    | Enzo Life Sciences, Plymouth Meeting, PA                    |
| rab3A                      | Gift from R. Jahn, Max Planck Institute, Gottingen, Germany |
| GAD65                      | De Camilli Lab, Yale Univeristy, New Haven, CT              |
| syntaxin                   | De Camilli Lab, Yale Univeristy, New Haven, CT              |
| synaptojanin               | De Camilli Lab, Yale Univeristy, New Haven, CT              |
| auxilin                    | De Camilli Lab, Yale Univeristy, New Haven, CT              |
| Hsc70                      | Thermo Scientific, Rockford, IL                             |
| SNX9                       | De Camilli Lab, Yale Univeristy, New Haven, CT              |
| pacsin                     | BD Biosciences - Transduction Lab, Franklin Lakes, NJ       |
| vGLUT1                     | Synaptic Systems, Goettingen, Germany                       |
| vGLUT2                     | Chemicon, Temecula, CA                                      |
| vGAT                       | Synaptic Systems, Goettingen, Germany                       |
| PSD-95                     | Millipore, Billerica, MA                                    |
| $\gamma$ -adaptin          | BD Biosciences - Transduction Lab, Franklin Lakes, NJ       |

## **SUPPLEMENTAL EXPERIMENTAL PROCEDURES**

### **Gene targeting strategies**

The endophilin 1 (SH3GL2) gene was inactivated in 129Sv/J ES cells by deleting the 3' end of the first coding exon (see Fig S1A). The endophilin 2 (SH3GL1) gene inactivation was achieved by removing all coding exons following exon 1 (Fig S1A). ES cell procedures to generate chimeras were performed as described (Cremona et al., 1999). The endophilin 3 (SH3GL3) conditional KO targeting vector was made by inGenious Targeting Laboratory (Stony Brook, New York, USA) by flanking a 1.8kb region containing exon 1 with loxP sites and inserting an FRT site flanked neomycin cassette into intron 1 (Fig S1A). The targeting vector was electroporated into hybrid C57BL/6J-129S1/Sv mouse embryonic stem cells, which were then selected and screened by Southern blotting. Chimeric animals were mated to a FLPe recombinase deleter strain to remove the neomycin selection cassette (Rodriguez et al., 2000). The absence of the neomycin selection cassette in the FLPe-positive off-spring was confirmed by PCR. Conditional mutants were then crossed with a  $\beta$ -actin-Cre mouse (FVB/N-Tg(ACTB-cre)2Mrt/J; (Lewandoski and Martin, 1997) to disrupt the endophilin 3 gene ubiquitously, so that a constitutive endophilin 3 KO could be generated. The genotyping of ES cell clones and mice lines was performed by PCR.

### **Plasmids**

A rat endophilin 2-Ruby construct was generated by replacing EGFP in pEGFP-endophilin 2 (Perera et al., 2006) with Ruby (Kredel et al., 2009) using BamHI and NotI restriction sites. A rat endophilin 2-BAR (1-247)-EGFP construct was generated by creating a PCR fragment encoding amino acids 1-247 with BglII and HindIII overhangs and then ligating it into the pEGFP-N1 vector (Clontech).

The hybrid CMV/chicken- $\beta$ -actin (CAG) promoter (Niwa et al., 1991) was used to achieve reliable long term gene expression in our primary neuron culture experiments. For this purpose, an NdeI to NheI fragment of the promoter from the pCAGGS plasmid was transferred into corresponding sites in either pEGFP-N1 or pEGFP-C1 (Clontech) to modify the existing CMV promoter in these plasmids, thus generating pCAG-EGFP-N1 or pCAG-EGFP-C1.

An EGFP-clathrin LCa construct under control of the CAG promoter was generated in the same manner from the pEGFP-C1-clathrin LCa plasmid (a gift from James Keen, Thomas Jefferson University, Philadelphia, PA).

A pCherry-N1 vector was generated by replacing EGFP in pEGFP-N1 vector with mCherry. mCherry was first amplified by PCR with flanking AgeI and NotI sites, digested with these enzymes and then ligated into pEGFP-N1.

Rat endophilin 1 full length (FL)-Cherry and rat endophilin 1-BAR (1-290)-Cherry under the CAG promoters were generated in two steps. First, endophilin 1 FL or endophilin 1-BAR (1-290) flanked by BamHI and AgeI sites were generated by PCR, digested and ligated into BamHI/AgeI digested pCherry N1 vector. Second, the CMV promoters of these newly constructed plasmids were exchanged with the CAG promoters (from pCAG-EGFP-N1) using NdeI/XhoI restriction enzymes.

A rat endophilin 1 FL-mRFP under control of the CAG promoter was generated by exchanging the CMV promoter of endophilin 1 FL-mRFP vector (Perera et al., 2006) with the CAG promoter (from pCAG-EGFP-N1) using the NdeI/KpnI restriction sites. A rat endophilin 1 BAR (1-290)-mRFP under the CAG promoter construct was created by exchanging the CMV promoter of rat endophilin 1 BAR-mRFP with the CAG promoter (from pCAG-EGFP-N1) using the NdeI/EcoRI restriction sites.

A CAG promoter driven synaptotHluorin plasmid was created by cutting synaptotHluorin from the original vector (Miesenbock et al., 1998) with XhoI/NotI restriction enzymes and inserting it into pCAG-EGFP vector cut with the same enzymes.

All constructs have been verified by sequencing and restriction enzyme digestions. The proper localization of all constructs with the CAG promoter was verified in cultured fibroblasts before their use in neurons.

### **Endophilin knock-down experiments**

RNAi-based knock-down of endophilin 2 in dynamin KO cells was achieved as described (Ferguson et al., 2009). siRNA sequences (Integrated DNA Technologies) were as follows, control: 5'-CUUCCUCUCUUUCUCUCCUUGGA-3' annealed to 5'-UCACAAGGGAGAGAAAGAGAGGAAGGA-3', endophilin 2: 5'-GAGCACCUUGGCAUAGACUGCUGCUG-3' annealed to 5'-

GCAGCAGUCUAAUGCCAAGGUGCTC-3'. Dynamin DKO cells and dynamin DKO/endophilin 2 KD cells were transfected with EGFP-synaptojanin 1-145 and mRFP-clathrin LC, and imaged by spinning disk confocal microscopy. For the quantification of synaptojanin spots, 150 x 150 pixel regions of 8 transfected cells per condition were randomly selected, thresholded and automatically counted using ImageJ software (1.43u; National Institutes of Health, Bethesda, MD).

### **Electron microscopy and tomography**

In experiments aimed at assessing the possible connection of clathrin-coated structures with the plasma membrane, neurons were incubated with 10 $\mu$ g/ml CT-HRP (Invitrogen) on ice, rinsed briefly and fixed immediately (no HRP uptake condition), or fixed after 60 min incubation at 37°C in Tyrode's buffer before processing of the peroxidase reaction.

For TEM tomography (Boulder Laboratory for 3D Electron Microscopy of Cells, University of Colorado) two orthogonal axes tilt series were recorded on a TECNAI F20 intermediate voltage electron microscope operating at 200 kV using the Serial-EM image acquisition program (Mastronarde et al, 2005). Images were captured at 1 degree intervals over a  $\pm$  60 degree range using a Gatan 2k x 2k CCD camera at a pixel size of 1 nm. STEM tomography (Italian Institute of Technology, Genova, Italy) was employed for the reconstruction of TKO synapses (figure 5 L) using a JEOL 2020 electron microscope operating at 200 kV with a spot size of 0.7 nm and the smallest condenser aperture resulting in collection angle of 3 mrad. The sample (300 nm thick sections) was mounted on a Fischione Ultra-Narrow Gap Tomography Holder and tilted over a  $\pm$  60 degree range according to a "Saxton scheme". Images were acquired using a HAADF detector at a magnification of 200.000X resulting in a pixel resolution of 1.58 nm. Tomograms reconstruction, segmentation and visualization was done using the IMOD software package (Mastronarde, 2005).

## SUPPLEMENTAL REFERENCES

- Cremona, O., Di Paolo, G., Wenk, M. R., Luthi, A., Kim, W. T., Takei, K., Daniell, L., Nemoto, Y., Shears, S. B., Flavell, R. A., *et al.* (1999). Essential role of phosphoinositide metabolism in synaptic vesicle recycling. *Cell* 99, 179-188.
- Ferguson, S. M., Raimondi, A., Paradise, S., Shen, H., Mesaki, K., Ferguson, A., Destaing, O., Ko, G., Takasaki, J., Cremona, O., *et al.* (2009). Coordinated actions of actin and BAR proteins upstream of dynamin at endocytic clathrin-coated pits. *Dev Cell* 17, 811-822.
- Kredel, S., Oswald, F., Nienhaus, K., Deuschle, K., Rocker, C., Wolff, M., Heilker, R., Nienhaus, G. U., and Wiedenmann, J. (2009). mRuby, a bright monomeric red fluorescent protein for labeling of subcellular structures. *PLoS One* 4, e4391.
- Lewandoski, M., and Martin, G. R. (1997). Cre-mediated chromosome loss in mice. *Nat Genet* 17, 223-225.
- Mastrorarde, D. N. (2005). Automated electron microscope tomography using robust prediction of specimen movements. *J Struct Biol* 152, 36-51.
- Miesenbock, G., De Angelis, D. A., and Rothman, J. E. (1998). Visualizing secretion and synaptic transmission with pH-sensitive green fluorescent proteins. *Nature* 394, 192-195.
- Niwa, H., Yamamura, K., and Miyazaki, J. (1991). Efficient selection for high-expression transfectants with a novel eukaryotic vector. *Gene* 108, 193-199.
- Perera, R. M., Zoncu, R., Lucast, L., De Camilli, P., and Toomre, D. (2006). Two synaptojanin 1 isoforms are recruited to clathrin-coated pits at different stages. *Proc Natl Acad Sci U S A* 103, 19332-19337.
- Rodriguez, C. I., Buchholz, F., Galloway, J., Sequerra, R., Kasper, J., Ayala, R., Stewart, A. F., and Dymecki, S. M. (2000). High-efficiency deleter mice show that FLPe is an alternative to Cre-loxP. *Nat Genet* 25, 139-140.
